# Supplementary material
Source: MDPI journal article supplement (https://www.mdpi.com/2073-4441/14/14/2172)
Supplement: s1 [file s1]

# Supplementary Files

**Table S1. Amplitudes of constituent obtained after harmonic analysis**

| Constituents | Amplitude | Phase  | Constituents | Amplitude | Phase  | Constituents   | Amplitude | Phase  |
|--------------|-----------|--------|--------------|-----------|--------|----------------|-----------|--------|
| <b>M2*</b>   | 0.1492    | 197.32 | <b>M3</b>    | 0.0065    | 309.82 | <b>2Q1</b>     | 0.0021    | 275.97 |
| <b>Sa</b>    | 0.1237    | 142.2  | <b>2MK3</b>  | 0.0051    | 82.95  | <b>rho1</b>    | 0.002     | 313.59 |
| <b>S2*</b>   | 0.0683    | 238.7  | <b>nu2</b>   | 0.0048    | 186.80 | <b>M6</b>      | 0.0016    | 16.05  |
| <b>K1*</b>   | 0.0333    | 43.27  | <b>L2</b>    | 0.0042    | 184.75 | <b>lambda2</b> | 0.0015    | 166.15 |
| <b>N2</b>    | 0.0266    | 187.0  | <b>Mm</b>    | 0.0041    | 41.64  | <b>S4</b>      | 0.0011    | 93.30  |
| <b>O1*</b>   | 0.0257    | 342.3  | <b>MS4</b>   | 0.0041    | 6.38   | <b>OO1</b>     | 0.0011    | 128.07 |
| <b>Ssa</b>   | 0.0251    | 322.2  | <b>R2</b>    | 0.0038    | 204.10 | <b>J1</b>      | 0.0008    | 136.71 |
| <b>K2</b>    | 0.018     | 233.4  | <b>2N2</b>   | 0.0038    | 188.44 | <b>M1</b>      | 0.0006    | 184.05 |
| <b>S1</b>    | 0.0114    | 55.96  | <b>Mf</b>    | 0.0035    | 211.60 | <b>MN4</b>     | 0.0003    | 237.60 |
| <b>P1</b>    | 0.0107    | 42.11  | <b>M4</b>    | 0.0032    | 276.75 | <b>M8</b>      | 0.0002    | 251.80 |
| <b>MSF</b>   | 0.0079    | 45.68  | <b>M3</b>    | 0.0031    | 115.81 | <b>S6</b>      | 0.0001    | 244.9  |
| <b>T2</b>    | 0.0073    | 253.9  | <b>2MK3</b>  | 0.0025    | 50.39  | <b>Z0</b>      | 0         | 0      |
| <b>Q1</b>    | 0.0069    | 313.0  | <b>MK3</b>   | 0.0065    | 309.8  |                |           |        |
| <b>mu2</b>   | 0.0069    | 206.0  | <b>2SM2</b>  | 0.0051    | 82.9   |                |           |        |

\*: Amplitudes of constituents used in computing tidal Form Ratio (Fr)

**Table S2. Subsample prediction of tidal level**

| Daily subsample | Prediction with wind input                                                                                                                                                                                                                               | Prediction without wind                                                                                                                                                                                                                                          |
|-----------------|----------------------------------------------------------------------------------------------------------------------------------------------------------------------------------------------------------------------------------------------------------|------------------------------------------------------------------------------------------------------------------------------------------------------------------------------------------------------------------------------------------------------------------|
| 7 days          | <p data-bbox="682 375 892 407">7-Day Tidal event with wind input<br/>Taehwa River</p> 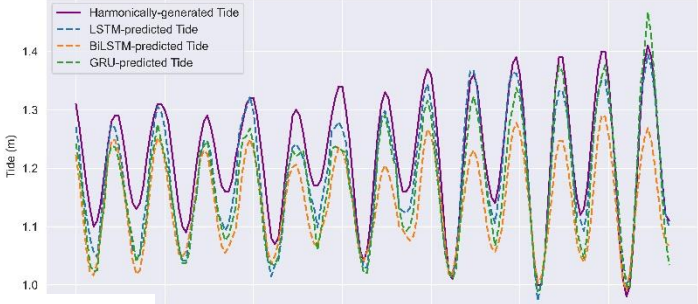 <p data-bbox="367 724 525 813">LSTM = 0.83<br/>GRU = 0.67<br/>BiLSTM = 0.23</p> | <p data-bbox="1459 375 1690 407">7-Day Tidal event with no wind input<br/>Taehwa River</p>  <p data-bbox="1165 732 1323 821">LSTM = 0.73<br/>GRU = 0.74<br/>BiLSTM = 0.73</p> |
| 14 days         | <p data-bbox="682 846 892 878">14-Day tidal event with wind<br/>Taehwa River</p>  <p data-bbox="367 1195 525 1284">LSTM = 0.90<br/>GRU = 0.82<br/>BiLSTM = 0.50</p>   | <p data-bbox="1459 846 1690 878">14-Day tidal event with no wind<br/>Taehwa River</p>  <p data-bbox="1165 1195 1323 1284">LSTM = 0.80<br/>GRU = 0.82<br/>BiLSTM = 0.85</p>   |

21 days

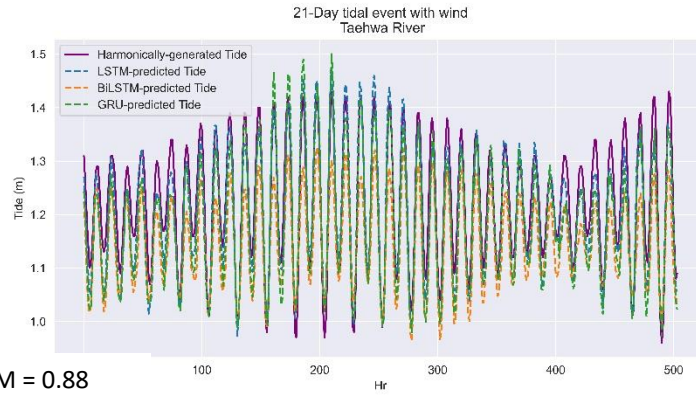

LSTM = 0.88  
GRU = 0.79  
BiLSTM = 0.43

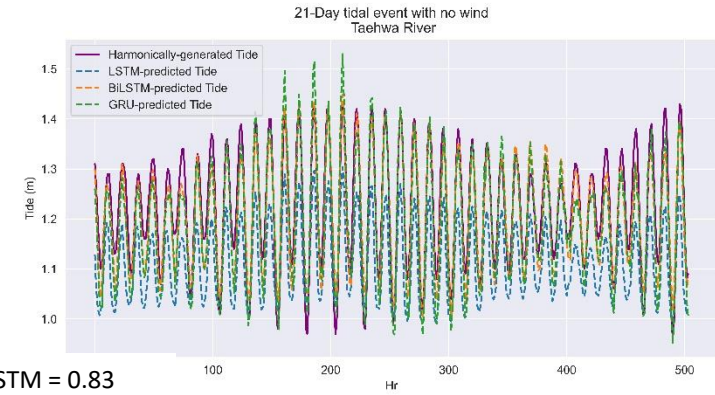

LSTM = 0.83  
GRU = 0.82  
BiLSTM = 0.84

28 days

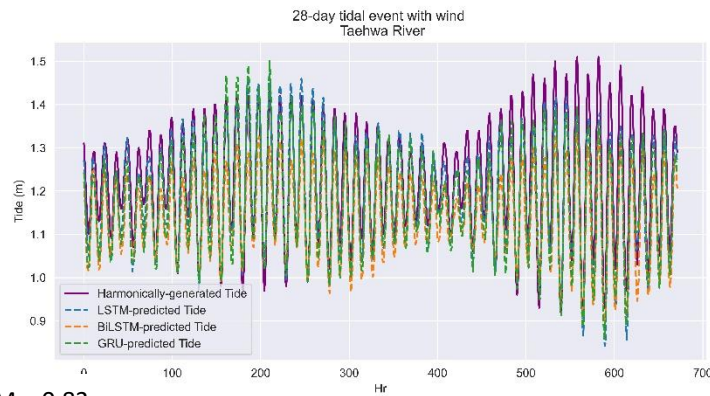

LSTM = 0.83  
GRU = 0.77  
BiLSTM = 0.47

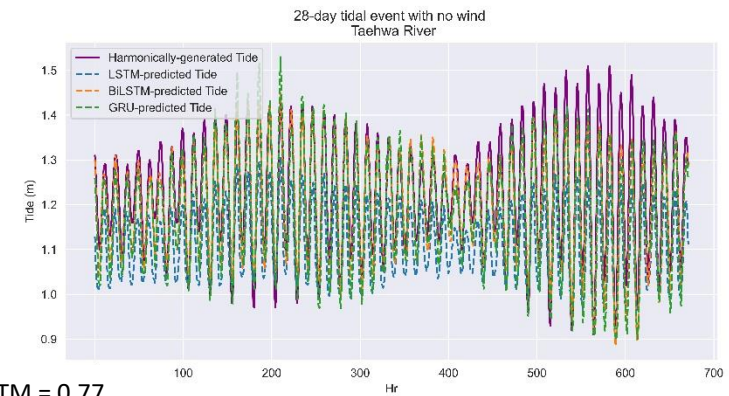

LSTM = 0.77  
GRU = 0.78  
BiLSTM = 0.80

35 days

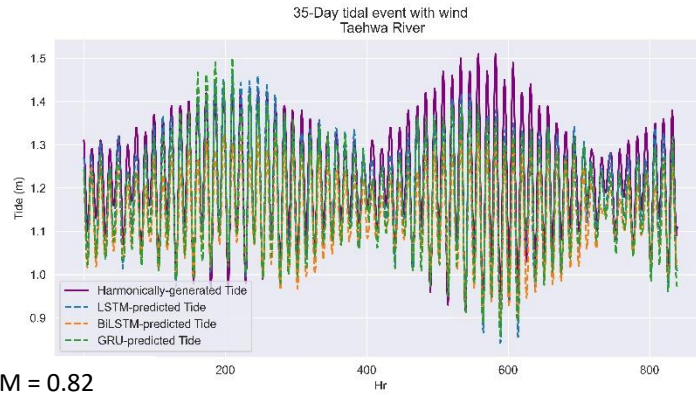

LSTM = 0.82  
GRU = 0.75  
BiLSTM = 0.44

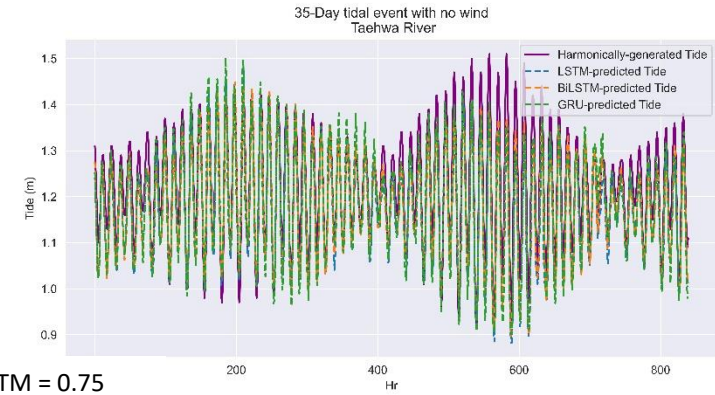

LSTM = 0.75  
GRU = 0.77  
BiLSTM = 0.78
